# Supplementary material for: Application of Intercriteria and Regression Analyses and Artificial Neural Network to Investigate the Relation of Crude Oil Assay Data to Oil Compatibility
Source: MDPI journal article supplement (doi:10.3390/pr12040780), 2024-04-12
Supplement: s1 [file s1]

## Supplementary Materials

# Application of Intercriteria and Regression Analyses and Artificial Neural Network to Investigate the Relation of Crude Oil Assay Data to Oil Compatibility

Ivelina Shiskova <sup>1</sup>, Dicho Stratiev <sup>1,2,\*</sup>, Mariana Tavlieva <sup>1</sup>, Angel Nedelchev <sup>1</sup>, Rosen Dinkov <sup>1</sup>, Iliyan Kolev <sup>1</sup>, Frans van den Berg <sup>3</sup>, Simeon Ribagin <sup>2,4</sup>, Sotir Sotirov <sup>5</sup>, Radoslava Nikolova <sup>6</sup>, Anife Veli <sup>6</sup>, Georgi Georgiev <sup>1</sup> and Krassimir Atanassov <sup>2</sup>

<sup>1</sup> LUKOIL Neftohim Burgas, 8104 Burgas, Bulgaria; shishkova.ivelina.k@neftochim.bg (I.S.); tavlieva.mariana.p@neftochim.bg (M.T.); kolev.iliyan.v@neftochim.bg (I.K.)

<sup>2</sup> Institute of Biophysics and Biomedical Engineering, Bulgarian Academy of Sciences, Georgi Bonchev 105, 1113 Sofia, Bulgaria

<sup>3</sup> Black Oil Solutions, 2401 Alphen aan den Rijn, The Netherlands; bergberg134@gmail.com

<sup>4</sup> Department of Health and Pharmaceutical Care, University Prof. Dr. Assen Zlatarov, Professor Yakimov 1, 8010 Burgas, Bulgaria

<sup>5</sup> Laboratory of Intelligent Systems, University Prof. Dr. Assen Zlatarov, Professor Yakimov 1, 8010 Burgas, Bulgaria; ssotirov@btu.bg

<sup>6</sup> Central Research Laboratory, University Prof. Dr. Assen Zlatarov, Professor Yakimov 1, 8010 Burgas, Bulgaria

\* Correspondence: stratiev.dicho@neftochim.bg

**Table S1.** Data of HTSD, and density of both samples of crude oil Helm, and their mixtures with n-heptane at the point of asphaltene precipitation onset, along with Kw-characterization factor, and Sp, and Sp critical

| Parameter                         | Helm 1.2022 | Helm 1.2022 /n-heptane | Parameter                         | Helm 1.2024 | Helm 1.2024 /n-heptane |
|-----------------------------------|-------------|------------------------|-----------------------------------|-------------|------------------------|
| Density 15 °C, g/cm <sup>3</sup>  | 0.9350      | 0.7960                 | Density 15 °C, g/cm <sup>3</sup>  | 0.9348      | 0.7726                 |
| Distillation ASTM D -7169, % mass | °C          | °C                     | Distillation ASTM D -7169, % mass | °C          | °C                     |
| 0.5                               | 106         | 87                     | 0.5                               | 82          | 87                     |
| 5                                 | 197         | 91                     | 5                                 | 155         | 95                     |
| 10                                | 244         | 93                     | 10                                | 211         | 97                     |
| 15                                | 280         | 99                     | 15                                | 251         | 98                     |
| 20                                | 310         | 99                     | 20                                | 283         | 99                     |
| 25                                | 339         | 100                    | 25                                | 312         | 99                     |
| 30                                | 364         | 105                    | 30                                | 339         | 99                     |
| 35                                | 392         | 132                    | 35                                | 367         | 100                    |
| 40                                | 415         | 199                    | 40                                | 393         | 100                    |
| 45                                | 436         | 274                    | 45                                | 418         | 100                    |
| 50                                | 459         | 327                    | 50                                | 441         | 101                    |
| 55                                | 484         | 369                    | 55                                | 465         | 101                    |
| 60                                | 511         | 410                    | 60                                | 493         | 181                    |

|               |             |                    |               |             |                    |
|---------------|-------------|--------------------|---------------|-------------|--------------------|
| 65            | 540         | 443                | 65            | 521         | 273                |
| 70            | 570         | 482                | 70            | 552         | 337                |
| 75            | 601         | 524                | 75            | 584         | 399                |
| 80            | 632         | 568                | 80            | 614         | 454                |
| 85            | 657         | 614                | 85            | 639         | 518                |
| 90            | 682         | 656                | 90            | 661         | 591                |
| 95            | 710         | 696                | 95            | 692         | 652                |
| 99.5          | 867         | 856                | 99.5          | 755         | 728                |
| Taverage, ° C | 464         | 333                | Taverage, ° C | 441         | 245                |
| Kw            | 11.41       | 11.94              | Kw            | 11.25       | 11.69              |
|               | <b>Sp</b>   | <b>SP critical</b> |               | <b>Sp</b>   | <b>SP critical</b> |
|               | <b>53.2</b> | <b>32.4</b>        |               | <b>59.4</b> | <b>42.3</b>        |

**Table S2.** True boiling point wide fraction yields of investigated crude oil samples

| No | Crude oil sample name         | IBP-110°C, wt. % | 110-180°C, wt. % | 180-240°C, wt. % | 240-360°C, wt. % | 360-540°C, wt. % | >540°C, wt. % |
|----|-------------------------------|------------------|------------------|------------------|------------------|------------------|---------------|
| 1  | Albanian 2015                 | 2.7              | 4.2              | 4.5              | 14.8             | 27.2             | 46.2          |
| 2  | Arabian Light_25.12.2019      | 10.0             | 11.7             | 9.1              | 21.4             | 25.2             | 21.7          |
| 3  | Arabian medium_2019           | 8.9              | 12.0             | 8.7              | 20.0             | 25.2             | 24.3          |
| 4  | Arabian Heavy - November 2015 | 6.9              | 8.9              | 8.1              | 19.9             | 25.9             | 29.1          |
| 5  | Aseng oil 2014                | 6.9              | 9.1              | 9.5              | 23.7             | 39.7             | 12.2          |
| 6  | Azery Light 2019              | 9.1              | 12.2             | 10.4             | 25.9             | 27.6             | 13.8          |
| 7  | Basrah light May 2019         | 9.0              | 10.4             | 7.7              | 18.5             | 25.4             | 27.9          |
| 8  | Basrah Medium_05.02.2022      | 8.4              | 9.5              | 8.5              | 18.7             | 25.6             | 28.4          |
| 9  | Basrah heavy_October 2015     | 6.0              | 8.3              | 8.4              | 17.6             | 25.6             | 33.2          |
| 10 | Boscan-06.2014                | 1.2              | 1.9              | 2.5              | 12.8             | 30.1             | 50.2          |
| 11 | BUZACHI_10.08.15              | 2.4              | 4.0              | 6.8              | 18.7             | 36.3             | 30.8          |
| 12 | CHELEKEN_06.05.15             | 5.5              | 10.0             | 11.3             | 28.4             | 28.2             | 15.6          |
| 13 | CPC_January 2018              | 17.8             | 19.5             | 12.7             | 24.1             | 18.8             | 6.1           |
| 14 | CPC_24.06.2020                | 16.6             | 20.2             | 13.9             | 24.6             | 18.5             | 5.2           |
| 15 | El Bouri -2015                | 5.4              | 8.9              | 8.2              | 18.8             | 32.4             | 25.4          |
| 16 | El Sharara_12.11.2021         | 16.0             | 17.4             | 13.5             | 24.2             | 20.3             | 7.5           |
| 17 | Forties Blend_22.08.2020      | 18.1             | 15.8             | 10.4             | 20.3             | 23.9             | 10.6          |
| 18 | Helm C.O._11.01.2022          | 2.2              | 5.5              | 6.4              | 20.6             | 30.3             | 34.1          |

|    |                                    |      |      |      |      |      |      |
|----|------------------------------------|------|------|------|------|------|------|
| 19 | Helm<br>C.O._27.12.2023            | 2.5  | 5.3  | 6.3  | 20.3 | 31.1 | 33.5 |
| 20 | Johan<br>Sverdrup_09.06.2023       | 7.4  | 7.7  | 8.5  | 22.8 | 29.3 | 23.3 |
| 21 | Kazakh 11.05.2015                  | 5.8  | 6.0  | 5.8  | 19.0 | 40.6 | 21.8 |
| 22 | Kirkuk_2015                        | 11.2 | 12.9 | 10.3 | 20.3 | 25.2 | 19.2 |
| 23 | Kuwait Export<br>06.2017           | 8.2  | 10.1 | 8.4  | 20.0 | 25.3 | 27.0 |
| 24 | OKWVIBOME<br>CO_23.12.14           | 7.2  | 10.6 | 11.2 | 34.9 | 29.3 | 12.2 |
| 25 | ORYX_2014                          | 5.6  | 8.9  | 7.5  | 16.2 | 24.5 | 36.2 |
| 26 | PRINOS-stabilized -<br>06.2019     | 10.1 | 11.6 | 8.6  | 22.4 | 27.4 | 18.9 |
| 27 | Ras<br>Gharib_17.05.2015           | 4.0  | 6.5  | 7.3  | 14.4 | 28.3 | 38.6 |
| 28 | REBCO_April 2019                   | 7.2  | 9.6  | 8.3  | 21.3 | 28.8 | 23.8 |
| 29 | Rhemoura<br>Melange_11.05.19       | 9.4  | 12.6 | 9.2  | 21.6 | 27.4 | 18.8 |
| 30 | Sepia_13.12.2023                   | 7.1  | 8.0  | 7.4  | 17.5 | 29.5 | 29.5 |
| 31 | Siberian<br>Light_December<br>2018 | 8.6  | 11.4 | 9.1  | 23.1 | 29.6 | 17.3 |
| 32 | SOUTHERN GREEN<br>CANYON 04.07.19  | 11.5 | 9.0  | 6.0  | 18.1 | 25.7 | 28.7 |
| 33 | Tartaruga Verde<br>C.O._08.12.2023 | 7.6  | 8.0  | 7.5  | 18.9 | 29.8 | 27.2 |
| 34 | Tempa<br>Rossa_21.05.2020          | 7.2  | 8.6  | 7.2  | 15.7 | 24.6 | 35.8 |
| 35 | VAL D"AGRI - Юли<br>2015           | 14.2 | 15.6 | 12.4 | 22.7 | 21.6 | 12.5 |
| 36 | Varandey<br>blend_17.11.12         | 10.3 | 10.8 | 12.8 | 21.0 | 30.4 | 13.7 |
| 37 | Western Desert<br>19.07.2023       | 16.8 | 15.5 | 10.4 | 23.6 | 23.2 | 9.6  |
| 38 | Es Sider                           | 6.9  | 12.7 | 11.1 | 22.1 | 27.0 | 17.5 |
| 39 | Payara Gold                        | 3.9  | 8.7  | 8.8  | 23.8 | 33.5 | 20.1 |
| 40 | KEBCO                              | 7.8  | 9.3  | 9.1  | 21.7 | 27.3 | 23.9 |
|    | Min                                | 1.2  | 1.9  | 2.5  | 12.8 | 18.5 | 5.2  |
|    | Max                                | 18.1 | 20.2 | 13.9 | 34.9 | 40.6 | 50.2 |

**Table S3.**  $\mu$ -values obtained from ICrA evaluation of fraction yields obtained during vacuum residue hydrocracking (vacuum residue hydrocracking data taken from ref. [66]. This data is related to a single crude oil source).

| $\mu$                        | Gas yield | Naphtha yield | Kerosene yield | Diesel yield | VGO yield | Vacuum residue (unconverted) |
|------------------------------|-----------|---------------|----------------|--------------|-----------|------------------------------|
| Gas yield                    | 1.00      | 0.93          | 0.95           | 0.95         | 0.47      | 0.05                         |
| Naphtha yield                | 0.93      | 1.00          | 0.96           | 0.95         | 0.47      | 0.02                         |
| Kerosene yield               | 0.95      | 0.96          | 1.00           | 0.96         | 0.45      | 0.00                         |
| Diesel yield                 | 0.95      | 0.95          | 0.96           | 1.00         | 0.49      | 0.04                         |
| VGO yield                    | 0.47      | 0.47          | 0.45           | 0.49         | 1.00      | 0.55                         |
| Vacuum residue (unconverted) | 0.05      | 0.02          | 0.00           | 0.04         | 0.55      | 1.00                         |

Note: Green color means statistically meaningful positive relation; Red color implies statistically meaningful negative relation. The intensity of the color designates the strength of the relation. The higher the color intensity, the higher the strength of the relation is. Yellow color denotes dissonance.

**Table S4.**  $\nu$ -values obtained from ICrA evaluation of fraction yields obtained during vacuum residue hydrocracking (vacuum residue hydrocracking data taken from ref. [66]. This data is related to a single crude oil source).

| $\nu$                        | Gas yield | Naphtha yield | Kerosene yield | Diesel yield | VGO yield | Vacuum residue (unconverted) |
|------------------------------|-----------|---------------|----------------|--------------|-----------|------------------------------|
| Gas yield                    | 0.00      | 0.07          | 0.04           | 0.05         | 0.53      | 0.95                         |
| Naphtha yield                | 0.07      | 0.00          | 0.02           | 0.05         | 0.53      | 0.98                         |
| Kerosene yield               | 0.04      | 0.02          | 0.00           | 0.02         | 0.53      | 0.98                         |
| Diesel yield                 | 0.05      | 0.05          | 0.02           | 0.00         | 0.51      | 0.96                         |
| VGO yield                    | 0.53      | 0.53          | 0.53           | 0.51         | 0.00      | 0.45                         |
| Vacuum residue (unconverted) | 0.95      | 0.98          | 0.98           | 0.96         | 0.45      | 0.00                         |

Note: Green color means statistically meaningful positive relation; Red color implies statistically meaningful negative relation. The intensity of the color designates the strength of the relation. The higher the color intensity, the higher the strength of the relation is. Yellow color denotes dissonance.

**Table S5.**  $\mu$ -values obtained from ICrA evaluation of Kw-characterization factors of crude oil fractions

| $\mu$ | 50   | 120  | 140  | 160  | 175  | 190  | 210  | 230  | 250  | 270  | 290  | 310  | 330  | 350  | 385  | 410  | 450  | 480  | 515  | 545  | >550°C |
|-------|------|------|------|------|------|------|------|------|------|------|------|------|------|------|------|------|------|------|------|------|--------|
| 50    | 1.00 | 0.73 | 0.69 | 0.69 | 0.73 | 0.73 | 0.70 | 0.66 | 0.58 | 0.63 | 0.46 | 0.48 | 0.52 | 0.47 | 0.46 | 0.48 | 0.48 | 0.44 | 0.42 | 0.42 | 0.47   |
| 120   | 0.73 | 1.00 | 0.91 | 0.88 | 0.87 | 0.81 | 0.82 | 0.78 | 0.63 | 0.66 | 0.48 | 0.48 | 0.51 | 0.46 | 0.45 | 0.46 | 0.44 | 0.40 | 0.40 | 0.38 | 0.46   |
| 140   | 0.69 | 0.91 | 1.00 | 0.87 | 0.86 | 0.81 | 0.82 | 0.81 | 0.66 | 0.67 | 0.50 | 0.48 | 0.50 | 0.45 | 0.45 | 0.46 | 0.43 | 0.39 | 0.39 | 0.38 | 0.47   |
| 160   | 0.69 | 0.88 | 0.87 | 1.00 | 0.91 | 0.84 | 0.79 | 0.78 | 0.63 | 0.68 | 0.49 | 0.48 | 0.51 | 0.45 | 0.45 | 0.45 | 0.43 | 0.40 | 0.40 | 0.39 | 0.46   |
| 175   | 0.73 | 0.87 | 0.86 | 0.91 | 1.00 | 0.90 | 0.82 | 0.80 | 0.67 | 0.69 | 0.50 | 0.50 | 0.53 | 0.48 | 0.47 | 0.46 | 0.46 | 0.42 | 0.40 | 0.39 | 0.49   |

|        |      |      |      |      |      |      |      |      |      |      |      |      |      |      |      |      |      |      |      |      |      |
|--------|------|------|------|------|------|------|------|------|------|------|------|------|------|------|------|------|------|------|------|------|------|
| 190    | 0.73 | 0.81 | 0.81 | 0.84 | 0.90 | 1.00 | 0.86 | 0.84 | 0.72 | 0.74 | 0.55 | 0.55 | 0.57 | 0.53 | 0.50 | 0.50 | 0.48 | 0.45 | 0.43 | 0.42 | 0.51 |
| 210    | 0.70 | 0.82 | 0.82 | 0.79 | 0.82 | 0.86 | 1.00 | 0.92 | 0.76 | 0.76 | 0.61 | 0.59 | 0.61 | 0.55 | 0.54 | 0.54 | 0.51 | 0.48 | 0.46 | 0.44 | 0.50 |
| 230    | 0.66 | 0.78 | 0.81 | 0.78 | 0.80 | 0.84 | 0.92 | 1.00 | 0.82 | 0.79 | 0.66 | 0.64 | 0.62 | 0.57 | 0.56 | 0.56 | 0.54 | 0.50 | 0.48 | 0.47 | 0.54 |
| 250    | 0.58 | 0.63 | 0.66 | 0.63 | 0.67 | 0.72 | 0.76 | 0.82 | 1.00 | 0.79 | 0.67 | 0.69 | 0.63 | 0.59 | 0.57 | 0.56 | 0.55 | 0.50 | 0.49 | 0.48 | 0.55 |
| 270    | 0.63 | 0.66 | 0.67 | 0.68 | 0.69 | 0.74 | 0.76 | 0.79 | 0.79 | 1.00 | 0.74 | 0.73 | 0.76 | 0.70 | 0.67 | 0.67 | 0.67 | 0.64 | 0.62 | 0.60 | 0.69 |
| 290    | 0.46 | 0.48 | 0.50 | 0.49 | 0.50 | 0.55 | 0.61 | 0.66 | 0.67 | 0.74 | 1.00 | 0.84 | 0.78 | 0.80 | 0.81 | 0.80 | 0.80 | 0.78 | 0.76 | 0.74 | 0.74 |
| 310    | 0.48 | 0.48 | 0.48 | 0.48 | 0.50 | 0.55 | 0.59 | 0.64 | 0.69 | 0.73 | 0.84 | 1.00 | 0.87 | 0.84 | 0.78 | 0.76 | 0.78 | 0.74 | 0.72 | 0.70 | 0.70 |
| 330    | 0.52 | 0.51 | 0.50 | 0.51 | 0.53 | 0.57 | 0.61 | 0.62 | 0.63 | 0.76 | 0.78 | 0.87 | 1.00 | 0.89 | 0.83 | 0.81 | 0.83 | 0.80 | 0.77 | 0.76 | 0.71 |
| 350    | 0.47 | 0.46 | 0.45 | 0.45 | 0.48 | 0.53 | 0.55 | 0.57 | 0.59 | 0.70 | 0.80 | 0.84 | 0.89 | 1.00 | 0.90 | 0.88 | 0.89 | 0.88 | 0.84 | 0.82 | 0.75 |
| 385    | 0.46 | 0.45 | 0.45 | 0.45 | 0.47 | 0.50 | 0.54 | 0.56 | 0.57 | 0.67 | 0.81 | 0.78 | 0.83 | 0.90 | 1.00 | 0.93 | 0.91 | 0.88 | 0.87 | 0.84 | 0.73 |
| 410    | 0.48 | 0.46 | 0.46 | 0.45 | 0.46 | 0.50 | 0.54 | 0.56 | 0.56 | 0.67 | 0.80 | 0.76 | 0.81 | 0.88 | 0.93 | 1.00 | 0.93 | 0.88 | 0.87 | 0.86 | 0.72 |
| 450    | 0.48 | 0.44 | 0.43 | 0.43 | 0.46 | 0.48 | 0.51 | 0.54 | 0.55 | 0.67 | 0.80 | 0.78 | 0.83 | 0.89 | 0.91 | 0.93 | 1.00 | 0.92 | 0.90 | 0.88 | 0.77 |
| 480    | 0.44 | 0.40 | 0.39 | 0.40 | 0.42 | 0.45 | 0.48 | 0.50 | 0.50 | 0.64 | 0.78 | 0.74 | 0.80 | 0.88 | 0.88 | 0.88 | 0.92 | 1.00 | 0.94 | 0.91 | 0.77 |
| 515    | 0.42 | 0.40 | 0.39 | 0.40 | 0.40 | 0.43 | 0.46 | 0.48 | 0.49 | 0.62 | 0.76 | 0.72 | 0.77 | 0.84 | 0.87 | 0.87 | 0.90 | 0.94 | 1.00 | 0.94 | 0.77 |
| 545    | 0.42 | 0.38 | 0.38 | 0.39 | 0.39 | 0.42 | 0.44 | 0.47 | 0.48 | 0.60 | 0.74 | 0.70 | 0.76 | 0.82 | 0.84 | 0.86 | 0.88 | 0.91 | 0.94 | 1.00 | 0.78 |
| >550°C | 0.47 | 0.46 | 0.47 | 0.46 | 0.49 | 0.51 | 0.50 | 0.54 | 0.55 | 0.69 | 0.74 | 0.70 | 0.71 | 0.75 | 0.73 | 0.72 | 0.77 | 0.77 | 0.77 | 0.78 | 1.00 |

**Table S6.**  $\nu$ -values obtained from ICRA evaluation of Kw-characterization factors of crude oil fractions

| $\nu$  | 50   | 120  | 140  | 160  | 175  | 190  | 210  | 230  | 250  | 270  | 290  | 310  | 330  | 350  | 385  | 410  | 450  | 480  | 515  | 545  | >550°C |
|--------|------|------|------|------|------|------|------|------|------|------|------|------|------|------|------|------|------|------|------|------|--------|
| 50     | 0.00 | 0.24 | 0.28 | 0.27 | 0.24 | 0.24 | 0.27 | 0.30 | 0.36 | 0.34 | 0.50 | 0.47 | 0.45 | 0.49 | 0.51 | 0.48 | 0.48 | 0.51 | 0.54 | 0.54 | 0.48   |
| 120    | 0.24 | 0.00 | 0.07 | 0.09 | 0.11 | 0.17 | 0.16 | 0.20 | 0.32 | 0.32 | 0.49 | 0.49 | 0.47 | 0.52 | 0.53 | 0.52 | 0.54 | 0.56 | 0.58 | 0.59 | 0.51   |
| 140    | 0.28 | 0.07 | 0.00 | 0.10 | 0.12 | 0.16 | 0.16 | 0.17 | 0.29 | 0.30 | 0.47 | 0.48 | 0.47 | 0.53 | 0.53 | 0.52 | 0.55 | 0.57 | 0.58 | 0.59 | 0.50   |
| 160    | 0.27 | 0.09 | 0.10 | 0.00 | 0.06 | 0.13 | 0.18 | 0.19 | 0.31 | 0.30 | 0.48 | 0.49 | 0.46 | 0.52 | 0.53 | 0.52 | 0.54 | 0.55 | 0.57 | 0.58 | 0.50   |
| 175    | 0.24 | 0.11 | 0.12 | 0.06 | 0.00 | 0.08 | 0.16 | 0.17 | 0.29 | 0.29 | 0.47 | 0.47 | 0.45 | 0.50 | 0.52 | 0.51 | 0.52 | 0.54 | 0.56 | 0.58 | 0.48   |
| 190    | 0.24 | 0.17 | 0.16 | 0.13 | 0.08 | 0.00 | 0.12 | 0.13 | 0.23 | 0.24 | 0.42 | 0.41 | 0.40 | 0.45 | 0.48 | 0.48 | 0.49 | 0.51 | 0.54 | 0.55 | 0.46   |
| 210    | 0.27 | 0.16 | 0.16 | 0.18 | 0.16 | 0.12 | 0.00 | 0.05 | 0.19 | 0.21 | 0.36 | 0.38 | 0.37 | 0.43 | 0.44 | 0.44 | 0.47 | 0.48 | 0.51 | 0.53 | 0.47   |
| 230    | 0.30 | 0.20 | 0.17 | 0.19 | 0.17 | 0.13 | 0.05 | 0.00 | 0.13 | 0.19 | 0.32 | 0.33 | 0.35 | 0.41 | 0.42 | 0.42 | 0.44 | 0.47 | 0.49 | 0.51 | 0.44   |
| 250    | 0.36 | 0.32 | 0.29 | 0.31 | 0.29 | 0.23 | 0.19 | 0.13 | 0.00 | 0.17 | 0.27 | 0.26 | 0.33 | 0.37 | 0.39 | 0.39 | 0.41 | 0.43 | 0.45 | 0.47 | 0.40   |
| 270    | 0.34 | 0.32 | 0.30 | 0.30 | 0.29 | 0.24 | 0.21 | 0.19 | 0.17 | 0.00 | 0.23 | 0.24 | 0.22 | 0.28 | 0.32 | 0.31 | 0.30 | 0.32 | 0.36 | 0.37 | 0.28   |
| 290    | 0.50 | 0.49 | 0.47 | 0.48 | 0.47 | 0.42 | 0.36 | 0.32 | 0.27 | 0.23 | 0.00 | 0.13 | 0.19 | 0.18 | 0.16 | 0.17 | 0.17 | 0.18 | 0.20 | 0.23 | 0.23   |
| 310    | 0.47 | 0.49 | 0.48 | 0.49 | 0.47 | 0.41 | 0.38 | 0.33 | 0.26 | 0.24 | 0.13 | 0.00 | 0.09 | 0.14 | 0.19 | 0.20 | 0.19 | 0.21 | 0.24 | 0.26 | 0.27   |
| 330    | 0.45 | 0.47 | 0.47 | 0.46 | 0.45 | 0.40 | 0.37 | 0.35 | 0.33 | 0.22 | 0.19 | 0.09 | 0.00 | 0.09 | 0.16 | 0.17 | 0.15 | 0.16 | 0.20 | 0.21 | 0.26   |
| 350    | 0.49 | 0.52 | 0.53 | 0.52 | 0.50 | 0.45 | 0.43 | 0.41 | 0.37 | 0.28 | 0.18 | 0.14 | 0.09 | 0.00 | 0.09 | 0.10 | 0.09 | 0.09 | 0.13 | 0.15 | 0.22   |
| 385    | 0.51 | 0.53 | 0.53 | 0.53 | 0.52 | 0.48 | 0.44 | 0.42 | 0.39 | 0.32 | 0.16 | 0.19 | 0.16 | 0.09 | 0.00 | 0.05 | 0.07 | 0.09 | 0.11 | 0.14 | 0.25   |
| 410    | 0.48 | 0.52 | 0.52 | 0.52 | 0.51 | 0.48 | 0.44 | 0.42 | 0.39 | 0.31 | 0.17 | 0.20 | 0.17 | 0.10 | 0.05 | 0.00 | 0.05 | 0.08 | 0.10 | 0.12 | 0.25   |
| 450    | 0.48 | 0.54 | 0.55 | 0.54 | 0.52 | 0.49 | 0.47 | 0.44 | 0.41 | 0.30 | 0.17 | 0.19 | 0.15 | 0.09 | 0.07 | 0.05 | 0.00 | 0.04 | 0.07 | 0.09 | 0.20   |
| 480    | 0.51 | 0.56 | 0.57 | 0.55 | 0.54 | 0.51 | 0.48 | 0.47 | 0.43 | 0.32 | 0.18 | 0.21 | 0.16 | 0.09 | 0.09 | 0.08 | 0.04 | 0.00 | 0.03 | 0.05 | 0.19   |
| 515    | 0.54 | 0.58 | 0.58 | 0.57 | 0.56 | 0.54 | 0.51 | 0.49 | 0.45 | 0.36 | 0.20 | 0.24 | 0.20 | 0.13 | 0.11 | 0.10 | 0.07 | 0.03 | 0.00 | 0.03 | 0.19   |
| 545    | 0.54 | 0.59 | 0.59 | 0.58 | 0.58 | 0.55 | 0.53 | 0.51 | 0.47 | 0.37 | 0.23 | 0.26 | 0.21 | 0.15 | 0.14 | 0.12 | 0.09 | 0.05 | 0.03 | 0.00 | 0.18   |
| >550°C | 0.48 | 0.51 | 0.50 | 0.50 | 0.48 | 0.46 | 0.47 | 0.44 | 0.40 | 0.28 | 0.23 | 0.27 | 0.26 | 0.22 | 0.25 | 0.25 | 0.20 | 0.19 | 0.19 | 0.18 | 0.00   |

**Table S7.**  $\mu$ -values obtained from ICrA evaluation of Kw-characterization factors of vacuum residue hydrocracking fractions (data taken from ref. [66])

| $\mu$      | VTB Kw | Kw-naphtha | Kw-diesel | Kw-HAGO | Kw-LVGO | Kw-HVGO |
|------------|--------|------------|-----------|---------|---------|---------|
| VTB Kw     | 1.00   | 0.49       | 0.74      | 0.91    | 0.88    | 0.86    |
| Kw-naphtha | 0.49   | 1.00       | 0.58      | 0.50    | 0.52    | 0.47    |
| Kw-diesel  | 0.74   | 0.58       | 1.00      | 0.80    | 0.81    | 0.80    |
| Kw-HAGO    | 0.91   | 0.50       | 0.80      | 1.00    | 0.94    | 0.91    |
| Kw-LVGO    | 0.88   | 0.52       | 0.81      | 0.94    | 1.00    | 0.92    |
| Kw-HVGO    | 0.86   | 0.47       | 0.80      | 0.91    | 0.92    | 1.00    |

**Table S8.**  $\nu$ -values obtained from ICrA evaluation of Kw-characterization factors of vacuum residue hydrocracking fractions (data taken from ref. [66])

| $\nu$      | VTB Kw | Kw-naphtha | Kw-diesel | Kw-HAGO | Kw-LVGO | Kw-HVGO |
|------------|--------|------------|-----------|---------|---------|---------|
| VTB Kw     | 0.00   | 0.49       | 0.23      | 0.06    | 0.09    | 0.12    |
| Kw-naphtha | 0.49   | 0.00       | 0.40      | 0.47    | 0.46    | 0.51    |
| Kw-diesel  | 0.23   | 0.40       | 0.00      | 0.18    | 0.18    | 0.19    |
| Kw-HAGO    | 0.06   | 0.47       | 0.18      | 0.00    | 0.04    | 0.08    |
| Kw-LVGO    | 0.09   | 0.46       | 0.18      | 0.04    | 0.00    | 0.08    |
| Kw-HVGO    | 0.12   | 0.51       | 0.19      | 0.08    | 0.08    | 0.00    |

**Table S9.**  $\mu$ -values obtained from ICrA evaluation of fraction yields obtained during hydrocracking of vacuum residues originated from 13 crude oils

| $\mu$   | Naphtha | Diesel | VGO  | VTB  |
|---------|---------|--------|------|------|
| Naphtha | 1.00    | 0.76   | 0.18 | 0.14 |
| Diesel  | 0.76    | 1.00   | 0.36 | 0.18 |
| VGO     | 0.18    | 0.36   | 1.00 | 0.67 |
| VTB     | 0.14    | 0.18   | 0.67 | 1.00 |

**Table S10.**  $\nu$ -values obtained from ICrA evaluation of fraction yields obtained during hydrocracking of vacuum residues originated from 13 crude oils

| $\nu$   | Naphtha | Diesel | VGO  | VTB  |
|---------|---------|--------|------|------|
| Naphtha | 0.00    | 0.24   | 0.81 | 0.85 |
| Diesel  | 0.24    | 0.00   | 0.63 | 0.81 |
| VGO     | 0.81    | 0.63   | 0.00 | 0.31 |
| VTB     | 0.85    | 0.81   | 0.31 | 0.00 |

**Table S11.** Bulk properties of studied crude oils, and some characteristics of their vacuum residue fractions

| Nr |                         | Crude D15 | Crude S | > 540 | VR SG  | VR CCR | VR S  | VR C7asp | VR C5asp | CO_C7 asp | CO_C5 asp | VR Kw | T50 | Kw   |
|----|-------------------------|-----------|---------|-------|--------|--------|-------|----------|----------|-----------|-----------|-------|-----|------|
| 1  | <b>Albania</b>          | 1.001     | 5.64    | 48.2  | 1.094  | 31.4   | 8.7   | 37.7     | 49.7     | 30.8      | 36.5      | 10.8  | 442 | 10.9 |
| 2  | <b>Arab Light</b>       | 0.858     | 1.89    | 22.9  | 1.029  | 18.7   | 4.9   | 12.1     | 18.8     | 4.7       | 7.6       | 11.42 | 353 | 12.1 |
| 3  | <b>Arab Med.</b>        | 0.872     | 2.48    | 25.2  | 1.031  | 20.7   | 5.4   | 14.6     | 25.5     | 5.6       | 8.9       | 11.40 | 366 | 12.1 |
| 4  | <b>Arab Heavy</b>       | 0.889     | 2.91    | 32    | 1.04   | 23.6   | 5.8   | 21.3     | 32.9     | 3.3       | 5.7       | 11.40 | 408 | 12.0 |
| 5  | <b>Aseng</b>            | 0.874     | 0.26    | 13.8  | 0.984  | 14.2   | 0.6   | 3.7      | 10       | 3.0       | 4.7       | 12.05 | 358 | 11.9 |
| 6  | <b>Azeri Light</b>      | 0.848     | 0.2     | 14.8  | 0.967  | 9.5    | 0.5   | 1.4      | 5.4      | 1.1       | 1.7       | 11.21 | 323 | 12.1 |
| 7  | <b>Basrah L</b>         | 0.878     | 2.85    | 28.3  | 1.052  | 23.8   | 5.9   | 18       | 27.7     | 9.0       | 11.1      | 11.21 | 390 | 12.0 |
| 8  | <b>Basrah Medium</b>    | 0.8836    | 3.1     | 28.35 | 1.0574 | 24.2   | 6.78  | 22.3     | 30.2     | 6.3       | 10.2      | 11.15 | 389 | 12.0 |
| 9  | <b>Basrah H</b>         | 0.905     | 3.86    | 33.8  | 1.071  | 28.9   | 7.1   | 27.7     | 37       | 9.7       | 14.8      | 11.10 | 433 | 11.8 |
| 10 | <b>Boscan</b>           | 1.002     | 5.5     | 63.1  | 1.078  | 27.8   | 6     | 35.2     | 41       | 27.5      | 37.0      | 10.96 | 558 | 11.5 |
| 11 | <b>Buzachi</b>          | 0.907     | 1.57    | 32.7  | 1.007  | 16     | 3.1   | 1.8      | 6.1      | 5.1       | 8.6       | 11.74 | 450 | 12.0 |
| 12 | <b>Cheleken</b>         | 0.847     | 0.4     | 16.6  | 0.974  | 12.3   | 1.2   | 5.8      | 12.5     | 2.3       | 3.2       | 12.08 | 345 | 12.2 |
| 13 | <b>CPC</b>              | 0.805     | 0.63    | 9.3   | 0.981  | 16     | 2.1   | 3.4      | 11       | 0.1       | 2.0       | 11.78 | 237 | 12.2 |
| 14 | <b>CPC-Jan. 2024</b>    | 0.7982    | 0.59    | 6.25  | 0.9477 | 8.4    | 1.46  | 2.6      | 11.8     | 0.2       | 0.7       | 12.19 | 238 | 12.1 |
| 15 | <b>El Bouri</b>         | 0.891     | 1.76    | 26.2  | 1.05   | 25.5   | 3.3   | 17.5     | 27.3     | 8.2       | 11.9      | 11.12 | 403 | 12.0 |
| 16 | <b>El Sharara</b>       | 0.814     | 0.08    | 8.7   | 0.976  | 13.1   | 0.39  | 10.1     | 17.0     | 2.2       | 2.5       | 11.92 | 253 | 12.1 |
| 17 | <b>Forties</b>          | 0.817     | 0.68    | 11.9  | 0.99   | 14.8   | 2.5   | 7.2      | 9.8      | 3.2       | 4.8       | 11.89 | 264 | 12.1 |
| 18 | <b>Helm</b>             | 0.935     | 1.71    | 35.6  | 1.054  | 23.28  | 3.013 | 10.1     | 18.5     | 11.8      | 19.6      | 11.17 | 448 | 11.7 |
| 19 | <b>Helm (Jan. 2024)</b> | 0.9348    | 1.63    | 35.12 | 1.0540 | 23.3   | 2.70  | 27.0     | 41.3     | 10.2      | 15.1      | 11.17 | 455 | 11.7 |
| 20 | <b>Johan Sverdrup</b>   | 0.8867    | 0.82    | 24.62 | 1.0225 | 19     | 1.77  | 16.4     | 27.4     | 4.2       | 8.3       | 11.89 | 390 | 12.0 |
| 21 | <b>Kazakh H</b>         | 0.858     | 0.81    | 23.7  | 0.99   | 17.1   | 1.7   | 11.1     | 17.8     | 3.1       | 5.8       | 11.22 | 426 | 12.3 |
| 22 | <b>Kirkuk</b>           | 0.873     | 2.65    | 24.6  | 1.054  | 25.2   | 5.9   | 24.3     | 33.1     | 7.0       | 11.2      | 11.41 | 332 | 12.0 |
| 23 | <b>KEB</b>              | 0.876     | 2.64    | 27.7  | 1.037  | 23.3   | 5.7   | 16.6     | 25.7     | 7.7       | 11.7      | 11.41 | 390 | 12.1 |
| 24 | <b>Okwuibome</b>        | 0.868     | 0.2     | 6.9   | 0.975  | 12.9   | 0.5   | 1.7      | 8.2      | 1.4       | 1.9       | 12.00 | 309 | 11.7 |
| 25 | <b>Oryx</b>             | 0.9156    | 4.209   | 37.4  | 1.089  | 29.4   | 8.01  | 30.9     | 39.6     | 16.5      | 23.7      | 10.91 | 448 | 11.9 |
| 26 | <b>Prinos</b>           | 0.875     | 3.71    | 20.3  | 1.108  | 32.8   | 9.14  | 30       | 38.8     | 9.1       | 14.7      | 10.55 | 345 | 11.8 |

|    |                       |        |      |       |        |       |      |       |       |       |       |       |     |       |
|----|-----------------------|--------|------|-------|--------|-------|------|-------|-------|-------|-------|-------|-----|-------|
| 27 | <b>RasGharib</b>      | 0.926  | 3.44 | 40.2  | 1.059  | 25.1  | 5.6  | 26    | 34.9  | 17.8  | 25.5  | 11.14 | 486 | 12.0  |
| 28 | <b>Urals</b>          | 0.877  | 1.53 | 25.2  | 0.997  | 17.5  | 3    | 14.1  | 17.6  | 3.8   | 6.3   | 11.82 | 386 | 12.1  |
| 29 | <b>Rhemoura</b>       | 0.865  | 0.75 | 20.2  | 1.041  | 23.7  | 1.8  | 23.2  | 31.3  | 6.2   | 10.3  | 11.24 | 342 | 12.0  |
| 30 | <b>Sepia</b>          | 0.8883 | 0.41 | 30.68 | 0.9984 | 13.8  | 0.75 | 8.5   | 17.1  | 3.5   | 7.3   | 11.82 | 430 | 12.2  |
| 31 | <b>LSCO</b>           | 0.854  | 0.57 | 18.7  | 0.993  | 14    | 1.58 | 7.8   | 15.5  | 3.2   | 6.3   | 11.84 | 348 | 12.1  |
| 32 | <b>SGC</b>            | 0.883  | 2.26 | 30.1  | 1.05   | 22.9  | 5.09 | 21.8  | 28.4  | 7.9   | 13.3  | 11.19 | 406 | 12.1  |
| 33 | <b>Tartaruga</b>      | 0.895  | 0.77 | 28.47 | 1.0081 | 16.3  | 1.35 | 14.3  | 22.4  | 4.3   | 7.7   | 11.68 | 415 | 12.0  |
| 34 | <b>Tempa rossa</b>    | 0.94   | 5.35 | 37.6  | 1.12   | 34.3  | 9.3  | 36.8  | 46.8  | 15.6  | 20.5  | 10.61 | 455 | 11.6  |
| 35 | <b>Val'Dagri</b>      | 0.832  | 1.97 | 14.6  | 1.052  | 21.4  | 6    | 8.5   | 19.5  | 1.9   | 3.6   | 11.18 | 280 | 12.0  |
| 36 | <b>Varandey</b>       | 0.85   | 0.63 | 14.9  | 0.990  | 15.1  | 1.7  | 7.6   | 13.5  | 1.1   | 2.0   | 11.90 | 336 | 12.1  |
| 37 | <b>Western Desert</b> | 0.8208 | 0.26 | 10.33 | 1.0524 | 24    | 1.31 | 17.9  | 24.7  | 2.0   | 3.8   | 11.14 | 266 | 12.0  |
|    | Min                   | 0.7982 | 0.08 | 6.25  | 0.95   | 8.38  | 0.39 | 1.40  | 5.40  | 0.05  | 0.74  | 10.55 | 237 | 10.85 |
|    | Max                   | 1.002  | 5.64 | 63.10 | 1.12   | 34.30 | 9.30 | 37.70 | 49.70 | 30.84 | 37.03 | 12.19 | 558 | 12.29 |

**Table S12.**  $\mu$ -values obtained from ICRA evaluation of crude bulk properties and some characteristics of their vacuum residue fractions, and oil compatibility parameters.

| $\mu$     | Crude D15 | Crude S | > 540 | VR SG | VR CCR | VR S | VR C7asp | VR C5asp | CO_C7 asp | CO_C5 asp | VR Kw | T50  | Kw   | SP (mod.) | SP cr. (mod.) | RCI (md.) | N-Heptane, wt. % | SBN/IN | SBN  | IN   | $\delta$ CO |
|-----------|-----------|---------|-------|-------|--------|------|----------|----------|-----------|-----------|-------|------|------|-----------|---------------|-----------|------------------|--------|------|------|-------------|
| Crude D15 | 1.00      | 0.74    | 0.89  | 0.75  | 0.72   | 0.68 | 0.73     | 0.74     | 0.82      | 0.82      | 0.28  | 0.89 | 0.24 | 0.72      | 0.58          | 0.53      | 0.53             | 0.59   | 0.96 | 0.66 | 0.96        |
| Crude S   | 0.74      | 1.00    | 0.79  | 0.84  | 0.85   | 0.92 | 0.82     | 0.82     | 0.81      | 0.81      | 0.19  | 0.71 | 0.30 | 0.67      | 0.61          | 0.42      | 0.42             | 0.47   | 0.73 | 0.68 | 0.73        |
| > 540     | 0.89      | 0.79    | 1.00  | 0.76  | 0.73   | 0.72 | 0.76     | 0.75     | 0.84      | 0.84      | 0.25  | 0.89 | 0.31 | 0.65      | 0.53          | 0.54      | 0.53             | 0.59   | 0.89 | 0.64 | 0.89        |
| VR SG     | 0.75      | 0.84    | 0.76  | 1.00  | 0.91   | 0.83 | 0.87     | 0.85     | 0.84      | 0.85      | 0.10  | 0.70 | 0.23 | 0.73      | 0.65          | 0.41      | 0.40             | 0.46   | 0.73 | 0.72 | 0.73        |
| VR CCR    | 0.72      | 0.85    | 0.73  | 0.91  | 1.00   | 0.84 | 0.86     | 0.86     | 0.80      | 0.81      | 0.11  | 0.67 | 0.26 | 0.71      | 0.68          | 0.36      | 0.36             | 0.41   | 0.70 | 0.76 | 0.70        |
| VR S      | 0.68      | 0.92    | 0.72  | 0.83  | 0.84   | 1.00 | 0.78     | 0.78     | 0.76      | 0.76      | 0.20  | 0.64 | 0.32 | 0.65      | 0.61          | 0.41      | 0.41             | 0.45   | 0.66 | 0.67 | 0.66        |
| VR C7asp  | 0.73      | 0.82    | 0.76  | 0.87  | 0.86   | 0.78 | 1.00     | 0.95     | 0.82      | 0.83      | 0.18  | 0.69 | 0.26 | 0.70      | 0.65          | 0.41      | 0.41             | 0.46   | 0.72 | 0.70 | 0.72        |



|                         |      |      |      |      |      |      |      |      |      |      |      |      |      |      |      |      |      |      |      |      |      |
|-------------------------|------|------|------|------|------|------|------|------|------|------|------|------|------|------|------|------|------|------|------|------|------|
| VR<br>C5asp             | 0.74 | 0.82 | 0.75 | 0.85 | 0.86 | 0.78 | 0.95 | 1.00 | 0.81 | 0.82 | 0.19 | 0.70 | 0.26 | 0.71 | 0.64 | 0.42 | 0.42 | 0.47 | 0.73 | 0.69 | 0.73 |
| CO_C7<br>asp            | 0.82 | 0.81 | 0.84 | 0.84 | 0.80 | 0.76 | 0.82 | 0.81 | 1.00 | 0.96 | 0.19 | 0.78 | 0.24 | 0.71 | 0.62 | 0.46 | 0.45 | 0.51 | 0.80 | 0.71 | 0.80 |
| CO_C5<br>asp            | 0.82 | 0.81 | 0.84 | 0.85 | 0.81 | 0.76 | 0.83 | 0.82 | 0.96 | 1.00 | 0.19 | 0.79 | 0.26 | 0.71 | 0.61 | 0.46 | 0.45 | 0.50 | 0.80 | 0.71 | 0.80 |
| VR Kw                   | 0.28 | 0.19 | 0.25 | 0.10 | 0.11 | 0.20 | 0.18 | 0.19 | 0.19 | 0.19 | 1.00 | 0.29 | 0.69 | 0.27 | 0.31 | 0.54 | 0.54 | 0.55 | 0.27 | 0.24 | 0.27 |
| T50                     | 0.89 | 0.71 | 0.89 | 0.70 | 0.67 | 0.64 | 0.69 | 0.70 | 0.78 | 0.79 | 0.29 | 1.00 | 0.32 | 0.64 | 0.50 | 0.55 | 0.54 | 0.60 | 0.91 | 0.63 | 0.91 |
| Kw                      | 0.24 | 0.30 | 0.31 | 0.23 | 0.26 | 0.32 | 0.26 | 0.26 | 0.24 | 0.26 | 0.69 | 0.32 | 1.00 | 0.03 | 0.28 | 0.43 | 0.43 | 0.44 | 0.24 | 0.34 | 0.24 |
| SP<br>(mod.)            | 0.72 | 0.67 | 0.65 | 0.73 | 0.71 | 0.65 | 0.70 | 0.71 | 0.71 | 0.71 | 0.27 | 0.64 | 0.03 | 1.00 | 0.68 | 0.48 | 0.47 | 0.51 | 0.72 | 0.63 | 0.72 |
| SP cr.<br>(mod.)        | 0.58 | 0.61 | 0.53 | 0.65 | 0.68 | 0.61 | 0.65 | 0.64 | 0.62 | 0.61 | 0.31 | 0.50 | 0.28 | 0.68 | 1.00 | 0.18 | 0.18 | 0.22 | 0.56 | 0.79 | 0.57 |
| RCI<br>(md.)            | 0.53 | 0.42 | 0.54 | 0.41 | 0.36 | 0.41 | 0.41 | 0.42 | 0.46 | 0.46 | 0.54 | 0.55 | 0.43 | 0.48 | 0.18 | 1.00 | 0.99 | 0.93 | 0.53 | 0.20 | 0.53 |
| N-<br>Heptane,<br>wt. % | 0.53 | 0.42 | 0.53 | 0.40 | 0.36 | 0.41 | 0.41 | 0.42 | 0.45 | 0.45 | 0.54 | 0.54 | 0.43 | 0.47 | 0.18 | 0.99 | 1.00 | 0.94 | 0.53 | 0.20 | 0.53 |
| SBN/IN                  | 0.59 | 0.47 | 0.59 | 0.46 | 0.41 | 0.45 | 0.46 | 0.47 | 0.51 | 0.50 | 0.55 | 0.60 | 0.44 | 0.51 | 0.22 | 0.93 | 0.94 | 1.00 | 0.59 | 0.26 | 0.59 |
| SBN                     | 0.96 | 0.73 | 0.89 | 0.73 | 0.70 | 0.66 | 0.72 | 0.73 | 0.80 | 0.80 | 0.27 | 0.91 | 0.24 | 0.72 | 0.56 | 0.53 | 0.53 | 0.59 | 1.00 | 0.65 | 1.00 |
| IN                      | 0.66 | 0.68 | 0.64 | 0.72 | 0.76 | 0.67 | 0.70 | 0.69 | 0.71 | 0.71 | 0.24 | 0.63 | 0.34 | 0.63 | 0.79 | 0.20 | 0.20 | 0.26 | 0.65 | 1.00 | 0.65 |
| δCO                     | 0.96 | 0.73 | 0.89 | 0.73 | 0.70 | 0.66 | 0.72 | 0.73 | 0.80 | 0.80 | 0.27 | 0.91 | 0.24 | 0.72 | 0.57 | 0.53 | 0.53 | 0.59 | 1.00 | 0.65 | 1.00 |

**Table S13.**  $v$ -values obtained from ICrA evaluation of crude bulk properties and some characteristics of their vacuum residue fractions, and oil compatibility parameters.

| $v$          | Crude<br>D15 | Crude<br>S | ><br>540 | VR<br>SG | VR<br>CCR | VR<br>S | VR<br>C7asp | VR<br>C5asp | CO_C7<br>asp | CO_C5<br>asp | VR<br>Kw | T50  | Kw   | SP<br>(mod.) | SP cr.<br>(mod.) | RCI<br>(md.) | N-<br>Heptane,<br>wt. % | SBN/IN | SBN  | IN   | δCO  |
|--------------|--------------|------------|----------|----------|-----------|---------|-------------|-------------|--------------|--------------|----------|------|------|--------------|------------------|--------------|-------------------------|--------|------|------|------|
| Crude<br>D15 | 0.00         | 0.24       | 0.08     | 0.22     | 0.26      | 0.30    | 0.25        | 0.24        | 0.15         | 0.16         | 0.69     | 0.08 | 0.72 | 0.24         | 0.40             | 0.39         | 0.39                    | 0.38   | 0.02 | 0.33 | 0.02 |
| Crude S      | 0.24         | 0.00       | 0.19     | 0.13     | 0.13      | 0.06    | 0.17        | 0.16        | 0.16         | 0.17         | 0.78     | 0.27 | 0.67 | 0.30         | 0.37             | 0.49         | 0.49                    | 0.50   | 0.24 | 0.30 | 0.25 |
| > 540        | 0.08         | 0.19       | 0.00     | 0.20     | 0.25      | 0.26    | 0.22        | 0.22        | 0.13         | 0.13         | 0.72     | 0.08 | 0.65 | 0.31         | 0.44             | 0.38         | 0.38                    | 0.38   | 0.09 | 0.34 | 0.09 |
| VR SG        | 0.22         | 0.13       | 0.20     | 0.00     | 0.07      | 0.14    | 0.11        | 0.12        | 0.12         | 0.12         | 0.87     | 0.27 | 0.73 | 0.23         | 0.32             | 0.50         | 0.50                    | 0.50   | 0.24 | 0.25 | 0.24 |

|                  |      |      |      |      |      |      |      |      |      |      |      |      |      |      |      |      |      |      |      |      |      |
|------------------|------|------|------|------|------|------|------|------|------|------|------|------|------|------|------|------|------|------|------|------|------|
| VR CCR           | 0.26 | 0.13 | 0.25 | 0.07 | 0.00 | 0.14 | 0.12 | 0.12 | 0.17 | 0.17 | 0.86 | 0.30 | 0.71 | 0.26 | 0.30 | 0.55 | 0.56 | 0.56 | 0.27 | 0.23 | 0.28 |
| VR S             | 0.30 | 0.06 | 0.26 | 0.14 | 0.14 | 0.00 | 0.21 | 0.20 | 0.21 | 0.22 | 0.77 | 0.33 | 0.64 | 0.32 | 0.37 | 0.51 | 0.51 | 0.52 | 0.31 | 0.32 | 0.31 |
| VR C7asp         | 0.25 | 0.17 | 0.22 | 0.11 | 0.12 | 0.21 | 0.00 | 0.04 | 0.16 | 0.15 | 0.79 | 0.29 | 0.70 | 0.26 | 0.33 | 0.51 | 0.51 | 0.52 | 0.26 | 0.29 | 0.26 |
| VR C5asp         | 0.24 | 0.16 | 0.22 | 0.12 | 0.12 | 0.20 | 0.04 | 0.00 | 0.17 | 0.16 | 0.78 | 0.28 | 0.71 | 0.26 | 0.34 | 0.50 | 0.50 | 0.50 | 0.25 | 0.30 | 0.25 |
| CO_C7 asp        | 0.15 | 0.16 | 0.13 | 0.12 | 0.17 | 0.21 | 0.16 | 0.17 | 0.00 | 0.02 | 0.77 | 0.18 | 0.71 | 0.24 | 0.35 | 0.45 | 0.45 | 0.45 | 0.16 | 0.27 | 0.16 |
| CO_C5 asp        | 0.16 | 0.17 | 0.13 | 0.12 | 0.17 | 0.22 | 0.15 | 0.16 | 0.02 | 0.00 | 0.77 | 0.18 | 0.71 | 0.26 | 0.36 | 0.46 | 0.46 | 0.46 | 0.17 | 0.27 | 0.17 |
| VR Kw            | 0.69 | 0.78 | 0.72 | 0.87 | 0.86 | 0.77 | 0.79 | 0.78 | 0.77 | 0.77 | 0.00 | 0.67 | 0.27 | 0.69 | 0.66 | 0.37 | 0.36 | 0.41 | 0.70 | 0.74 | 0.70 |
| T50              | 0.08 | 0.27 | 0.08 | 0.27 | 0.30 | 0.33 | 0.29 | 0.28 | 0.18 | 0.18 | 0.67 | 0.00 | 0.64 | 0.32 | 0.47 | 0.37 | 0.37 | 0.36 | 0.06 | 0.35 | 0.06 |
| Kw               | 0.72 | 0.67 | 0.65 | 0.73 | 0.71 | 0.64 | 0.70 | 0.71 | 0.71 | 0.71 | 0.27 | 0.64 | 0.00 | 0.97 | 0.68 | 0.47 | 0.47 | 0.51 | 0.72 | 0.63 | 0.72 |
| SP (mod.)        | 0.24 | 0.30 | 0.31 | 0.23 | 0.26 | 0.32 | 0.26 | 0.26 | 0.24 | 0.26 | 0.69 | 0.32 | 0.97 | 0.00 | 0.28 | 0.43 | 0.43 | 0.44 | 0.24 | 0.34 | 0.24 |
| SP cr. (mod.)    | 0.40 | 0.37 | 0.44 | 0.32 | 0.30 | 0.37 | 0.33 | 0.34 | 0.35 | 0.36 | 0.66 | 0.47 | 0.68 | 0.28 | 0.00 | 0.74 | 0.73 | 0.74 | 0.41 | 0.19 | 0.41 |
| RCI (md.)        | 0.39 | 0.49 | 0.38 | 0.50 | 0.55 | 0.51 | 0.51 | 0.50 | 0.45 | 0.46 | 0.37 | 0.37 | 0.47 | 0.43 | 0.74 | 0.00 | 0.00 | 0.01 | 0.38 | 0.73 | 0.38 |
| N-Heptane, wt. % | 0.39 | 0.49 | 0.38 | 0.50 | 0.56 | 0.51 | 0.51 | 0.50 | 0.45 | 0.46 | 0.36 | 0.37 | 0.47 | 0.43 | 0.73 | 0.00 | 0.00 | 0.01 | 0.38 | 0.73 | 0.38 |
| SBN/IN           | 0.38 | 0.50 | 0.38 | 0.50 | 0.56 | 0.52 | 0.52 | 0.50 | 0.45 | 0.46 | 0.41 | 0.36 | 0.51 | 0.44 | 0.74 | 0.01 | 0.01 | 0.00 | 0.38 | 0.72 | 0.38 |
| SBN              | 0.02 | 0.24 | 0.09 | 0.24 | 0.27 | 0.31 | 0.26 | 0.25 | 0.16 | 0.17 | 0.70 | 0.06 | 0.72 | 0.24 | 0.41 | 0.38 | 0.38 | 0.38 | 0.00 | 0.33 | 0.00 |
| IN               | 0.33 | 0.30 | 0.34 | 0.25 | 0.23 | 0.32 | 0.29 | 0.30 | 0.27 | 0.27 | 0.74 | 0.35 | 0.63 | 0.34 | 0.19 | 0.73 | 0.73 | 0.72 | 0.33 | 0.00 | 0.33 |
| δCO              | 0.02 | 0.25 | 0.09 | 0.24 | 0.28 | 0.31 | 0.26 | 0.25 | 0.16 | 0.17 | 0.70 | 0.06 | 0.72 | 0.24 | 0.41 | 0.38 | 0.38 | 0.38 | 0.00 | 0.33 | 0.00 |

**Table S14.**  $\mu$ -values obtained from ICrA evaluation for similarity of investigated 41 crude oils

| <b>Mu</b>      | Arab Light | Arabian Med | Basrah Light | Basrah Med. | Bonga | Cheleken | Kirkuk | REBCO | Rhemoura | Siberian Light | Vald'Agri |
|----------------|------------|-------------|--------------|-------------|-------|----------|--------|-------|----------|----------------|-----------|
| Albanian       | 0.226      | 0.276       | 0.364        | 0.393       | 0.341 | 0.240    | 0.226  | 0.273 | 0.261    | 0.251          | 0.215     |
| Arab Light     | 1.000      | 0.917       | 0.803        | 0.753       | 0.650 | 0.718    | 0.908  | 0.722 | 0.737    | 0.733          | 0.902     |
| Arabian Med    | 0.917      | 1.000       | 0.864        | 0.816       | 0.610 | 0.666    | 0.897  | 0.672 | 0.690    | 0.691          | 0.869     |
| Arab Heavy     | 0.772      | 0.838       | 0.877        | 0.853       | 0.545 | 0.552    | 0.773  | 0.576 | 0.588    | 0.587          | 0.759     |
| Aseng          | 0.596      | 0.538       | 0.435        | 0.408       | 0.832 | 0.828    | 0.575  | 0.833 | 0.821    | 0.820          | 0.592     |
| Azery Light    | 0.675      | 0.617       | 0.508        | 0.487       | 0.822 | 0.903    | 0.661  | 0.879 | 0.895    | 0.907          | 0.677     |
| Basrah Light   | 0.803      | 0.864       | 1.000        | 0.933       | 0.547 | 0.555    | 0.793  | 0.560 | 0.584    | 0.582          | 0.780     |
| Basrah Med     | 0.753      | 0.816       | 0.933        | 1.000       | 0.539 | 0.527    | 0.762  | 0.541 | 0.559    | 0.558          | 0.752     |
| Basrah heavy   | 0.599      | 0.670       | 0.774        | 0.818       | 0.464 | 0.411    | 0.623  | 0.458 | 0.457    | 0.455          | 0.602     |
| Bonga          | 0.650      | 0.610       | 0.547        | 0.539       | 1.000 | 0.784    | 0.643  | 0.847 | 0.850    | 0.844          | 0.679     |
| Boscan         | 0.228      | 0.288       | 0.396        | 0.423       | 0.295 | 0.160    | 0.241  | 0.241 | 0.203    | 0.187          | 0.228     |
| Buzachi        | 0.467      | 0.510       | 0.574        | 0.606       | 0.746 | 0.636    | 0.491  | 0.710 | 0.684    | 0.672          | 0.498     |
| Cheleken       | 0.718      | 0.666       | 0.555        | 0.527       | 0.784 | 1.000    | 0.698  | 0.868 | 0.880    | 0.891          | 0.707     |
| CPC            | 0.694      | 0.638       | 0.518        | 0.472       | 0.639 | 0.744    | 0.675  | 0.686 | 0.700    | 0.718          | 0.677     |
| El Bouri       | 0.599      | 0.605       | 0.573        | 0.568       | 0.831 | 0.714    | 0.604  | 0.808 | 0.781    | 0.767          | 0.613     |
| El Sharara     | 0.747      | 0.686       | 0.580        | 0.539       | 0.765 | 0.857    | 0.736  | 0.791 | 0.824    | 0.839          | 0.762     |
| Es Sider       | 0.769      | 0.719       | 0.621        | 0.595       | 0.728 | 0.806    | 0.772  | 0.759 | 0.781    | 0.786          | 0.780     |
| Forties Blend  | 0.772      | 0.714       | 0.618        | 0.593       | 0.732 | 0.768    | 0.763  | 0.755 | 0.795    | 0.818          | 0.798     |
| Helm           | 0.499      | 0.526       | 0.570        | 0.609       | 0.711 | 0.616    | 0.502  | 0.683 | 0.667    | 0.647          | 0.507     |
| Iranian Heavy  | 0.749      | 0.752       | 0.696        | 0.692       | 0.734 | 0.720    | 0.755  | 0.787 | 0.767    | 0.759          | 0.743     |
| Johan Sverdrup | 0.621      | 0.584       | 0.539        | 0.536       | 0.900 | 0.735    | 0.610  | 0.811 | 0.808    | 0.798          | 0.637     |
| Kazakh         | 0.669      | 0.621       | 0.541        | 0.528       | 0.825 | 0.828    | 0.647  | 0.883 | 0.879    | 0.864          | 0.648     |
| KEBCO          | 0.833      | 0.804       | 0.730        | 0.705       | 0.782 | 0.786    | 0.831  | 0.793 | 0.811    | 0.818          | 0.854     |
| Kirkuk         | 0.908      | 0.897       | 0.793        | 0.762       | 0.643 | 0.698    | 1.000  | 0.705 | 0.723    | 0.728          | 0.914     |
| Kumkol         | 0.561      | 0.508       | 0.408        | 0.375       | 0.509 | 0.629    | 0.554  | 0.577 | 0.585    | 0.599          | 0.553     |

|                 |       |       |       |       |       |       |       |       |       |       |       |
|-----------------|-------|-------|-------|-------|-------|-------|-------|-------|-------|-------|-------|
| Kuwait Export   | 0.787 | 0.861 | 0.880 | 0.866 | 0.554 | 0.621 | 0.806 | 0.639 | 0.645 | 0.641 | 0.781 |
| Okwuibome       | 0.697 | 0.666 | 0.639 | 0.641 | 0.826 | 0.717 | 0.700 | 0.720 | 0.745 | 0.759 | 0.733 |
| Payara Gold     | 0.630 | 0.603 | 0.569 | 0.582 | 0.903 | 0.730 | 0.642 | 0.793 | 0.793 | 0.793 | 0.676 |
| Prinos          | 0.601 | 0.613 | 0.701 | 0.689 | 0.604 | 0.539 | 0.602 | 0.593 | 0.583 | 0.559 | 0.592 |
| Ras Gharib      | 0.409 | 0.475 | 0.582 | 0.619 | 0.414 | 0.286 | 0.430 | 0.364 | 0.346 | 0.318 | 0.407 |
| REBCO           | 0.722 | 0.672 | 0.560 | 0.541 | 0.847 | 0.868 | 0.705 | 1.000 | 0.927 | 0.920 | 0.712 |
| Rhemoura        | 0.737 | 0.690 | 0.584 | 0.559 | 0.850 | 0.880 | 0.723 | 0.927 | 1.000 | 0.952 | 0.738 |
| Sepia           | 0.615 | 0.581 | 0.535 | 0.557 | 0.810 | 0.748 | 0.582 | 0.750 | 0.745 | 0.732 | 0.598 |
| Siberian Light  | 0.733 | 0.691 | 0.582 | 0.558 | 0.844 | 0.891 | 0.728 | 0.920 | 0.952 | 1.000 | 0.746 |
| SGC             | 0.654 | 0.637 | 0.594 | 0.623 | 0.697 | 0.681 | 0.642 | 0.760 | 0.760 | 0.746 | 0.661 |
| Tartaruga Verde | 0.613 | 0.574 | 0.547 | 0.569 | 0.838 | 0.685 | 0.591 | 0.754 | 0.745 | 0.729 | 0.618 |
| Tempa Rossa     | 0.504 | 0.567 | 0.682 | 0.709 | 0.337 | 0.274 | 0.525 | 0.297 | 0.303 | 0.290 | 0.496 |
| Vald'Agri       | 0.902 | 0.869 | 0.780 | 0.752 | 0.679 | 0.707 | 0.914 | 0.712 | 0.738 | 0.746 | 1.000 |
| Varandey        | 0.725 | 0.681 | 0.582 | 0.557 | 0.840 | 0.866 | 0.727 | 0.876 | 0.897 | 0.922 | 0.742 |
| Western Desert  | 0.759 | 0.692 | 0.592 | 0.559 | 0.785 | 0.843 | 0.737 | 0.824 | 0.861 | 0.879 | 0.767 |

**Table S15.**  $\nu$ -values obtained from ICrA evaluation for similarity of investigated 41 crude oils

| Nu           | Arab Light | Arabian Med | Basrah Light | Basrah Med. | Bonga | Cheleken | Kirkuk | REBCO | Rhemoura | Sib. Light | Vald'Agri |
|--------------|------------|-------------|--------------|-------------|-------|----------|--------|-------|----------|------------|-----------|
| Albanian     | 0.579      | 0.529       | 0.442        | 0.410       | 0.465 | 0.566    | 0.579  | 0.532 | 0.546    | 0.553      | 0.588     |
| Arab Light   | 0.000      | 0.080       | 0.194        | 0.241       | 0.346 | 0.277    | 0.086  | 0.275 | 0.260    | 0.263      | 0.093     |
| Arabian Med  | 0.080      | 0.000       | 0.133        | 0.180       | 0.387 | 0.331    | 0.098  | 0.325 | 0.308    | 0.306      | 0.127     |
| Arab Heavy   | 0.224      | 0.159       | 0.119        | 0.141       | 0.450 | 0.442    | 0.221  | 0.421 | 0.409    | 0.409      | 0.236     |
| Aseng        | 0.401      | 0.461       | 0.562        | 0.587       | 0.165 | 0.168    | 0.419  | 0.165 | 0.177    | 0.178      | 0.404     |
| Azery Light  | 0.318      | 0.377       | 0.485        | 0.504       | 0.172 | 0.090    | 0.330  | 0.114 | 0.099    | 0.086      | 0.315     |
| Basrah Light | 0.194      | 0.133       | 0.000        | 0.061       | 0.449 | 0.440    | 0.201  | 0.436 | 0.414    | 0.415      | 0.215     |

|                |       |       |       |       |       |       |       |       |       |       |       |
|----------------|-------|-------|-------|-------|-------|-------|-------|-------|-------|-------|-------|
| Basrah Med     | 0.241 | 0.180 | 0.061 | 0.000 | 0.455 | 0.467 | 0.231 | 0.454 | 0.436 | 0.437 | 0.242 |
| Basrah heavy   | 0.399 | 0.328 | 0.223 | 0.178 | 0.533 | 0.585 | 0.372 | 0.540 | 0.541 | 0.543 | 0.394 |
| Bonga          | 0.346 | 0.387 | 0.449 | 0.455 | 0.000 | 0.211 | 0.350 | 0.150 | 0.147 | 0.152 | 0.316 |
| Boscan         | 0.670 | 0.610 | 0.504 | 0.477 | 0.602 | 0.736 | 0.659 | 0.657 | 0.695 | 0.710 | 0.670 |
| Buzachi        | 0.530 | 0.488 | 0.422 | 0.389 | 0.249 | 0.359 | 0.502 | 0.287 | 0.313 | 0.325 | 0.497 |
| Cheleken       | 0.277 | 0.331 | 0.440 | 0.467 | 0.211 | 0.000 | 0.295 | 0.128 | 0.117 | 0.105 | 0.287 |
| CPC            | 0.231 | 0.288 | 0.410 | 0.455 | 0.285 | 0.180 | 0.253 | 0.240 | 0.226 | 0.208 | 0.249 |
| El Bouri       | 0.396 | 0.391 | 0.422 | 0.425 | 0.164 | 0.280 | 0.388 | 0.188 | 0.215 | 0.228 | 0.380 |
| El Sharara     | 0.245 | 0.307 | 0.413 | 0.451 | 0.228 | 0.135 | 0.254 | 0.202 | 0.169 | 0.154 | 0.230 |
| Es Sider       | 0.226 | 0.277 | 0.374 | 0.399 | 0.267 | 0.189 | 0.221 | 0.236 | 0.215 | 0.210 | 0.214 |
| Forties Blend  | 0.224 | 0.283 | 0.379 | 0.402 | 0.264 | 0.227 | 0.230 | 0.242 | 0.202 | 0.179 | 0.197 |
| Helm           | 0.499 | 0.472 | 0.428 | 0.387 | 0.287 | 0.381 | 0.493 | 0.316 | 0.332 | 0.352 | 0.490 |
| Iranian Heavy  | 0.245 | 0.242 | 0.299 | 0.300 | 0.259 | 0.273 | 0.237 | 0.207 | 0.228 | 0.235 | 0.250 |
| Johan Sverdrup | 0.376 | 0.415 | 0.458 | 0.459 | 0.097 | 0.261 | 0.384 | 0.187 | 0.190 | 0.200 | 0.359 |
| Kazakh         | 0.326 | 0.374 | 0.453 | 0.464 | 0.169 | 0.166 | 0.345 | 0.111 | 0.117 | 0.131 | 0.345 |
| KEBCO          | 0.163 | 0.193 | 0.267 | 0.289 | 0.214 | 0.209 | 0.163 | 0.203 | 0.186 | 0.178 | 0.141 |
| Kirkuk         | 0.086 | 0.098 | 0.201 | 0.231 | 0.350 | 0.295 | 0.000 | 0.289 | 0.272 | 0.266 | 0.079 |
| Kumkol         | 0.111 | 0.163 | 0.264 | 0.296 | 0.166 | 0.046 | 0.117 | 0.094 | 0.087 | 0.074 | 0.120 |
| Kuwait Export  | 0.208 | 0.135 | 0.115 | 0.127 | 0.441 | 0.373 | 0.186 | 0.357 | 0.351 | 0.355 | 0.213 |
| Okwuibome      | 0.295 | 0.327 | 0.353 | 0.350 | 0.166 | 0.274 | 0.289 | 0.272 | 0.248 | 0.234 | 0.257 |
| Payara Gold    | 0.367 | 0.395 | 0.428 | 0.413 | 0.094 | 0.266 | 0.353 | 0.205 | 0.205 | 0.205 | 0.320 |
| Prinos         | 0.394 | 0.384 | 0.294 | 0.305 | 0.391 | 0.456 | 0.391 | 0.403 | 0.413 | 0.437 | 0.402 |
| Ras Gharib     | 0.586 | 0.521 | 0.413 | 0.374 | 0.580 | 0.708 | 0.562 | 0.631 | 0.649 | 0.678 | 0.587 |
| REBCO          | 0.275 | 0.325 | 0.436 | 0.454 | 0.150 | 0.128 | 0.289 | 0.000 | 0.071 | 0.077 | 0.283 |
| Rhemoura       | 0.260 | 0.308 | 0.414 | 0.436 | 0.147 | 0.117 | 0.272 | 0.071 | 0.000 | 0.046 | 0.258 |
| Sepia          | 0.379 | 0.414 | 0.458 | 0.435 | 0.182 | 0.244 | 0.408 | 0.244 | 0.249 | 0.262 | 0.394 |
| Sib. Light     | 0.263 | 0.306 | 0.415 | 0.437 | 0.152 | 0.105 | 0.266 | 0.077 | 0.046 | 0.000 | 0.249 |

|                 |       |       |       |       |       |       |       |       |       |       |       |
|-----------------|-------|-------|-------|-------|-------|-------|-------|-------|-------|-------|-------|
| SGC             | 0.342 | 0.360 | 0.402 | 0.371 | 0.298 | 0.314 | 0.351 | 0.236 | 0.236 | 0.251 | 0.333 |
| Tartaruga Verde | 0.382 | 0.422 | 0.448 | 0.424 | 0.158 | 0.310 | 0.402 | 0.242 | 0.252 | 0.267 | 0.376 |
| Tempa Rossa     | 0.487 | 0.424 | 0.309 | 0.280 | 0.654 | 0.716 | 0.463 | 0.695 | 0.689 | 0.701 | 0.493 |
| Vald'Agri       | 0.093 | 0.127 | 0.215 | 0.242 | 0.316 | 0.287 | 0.079 | 0.283 | 0.258 | 0.249 | 0.000 |
| Varandey        | 0.271 | 0.317 | 0.415 | 0.438 | 0.156 | 0.129 | 0.266 | 0.121 | 0.101 | 0.075 | 0.253 |
| Western Desert  | 0.237 | 0.305 | 0.404 | 0.436 | 0.211 | 0.152 | 0.257 | 0.173 | 0.137 | 0.118 | 0.228 |

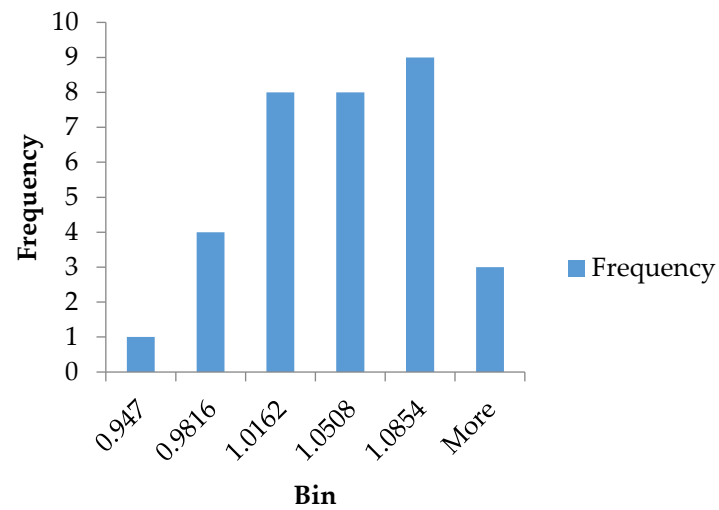

a

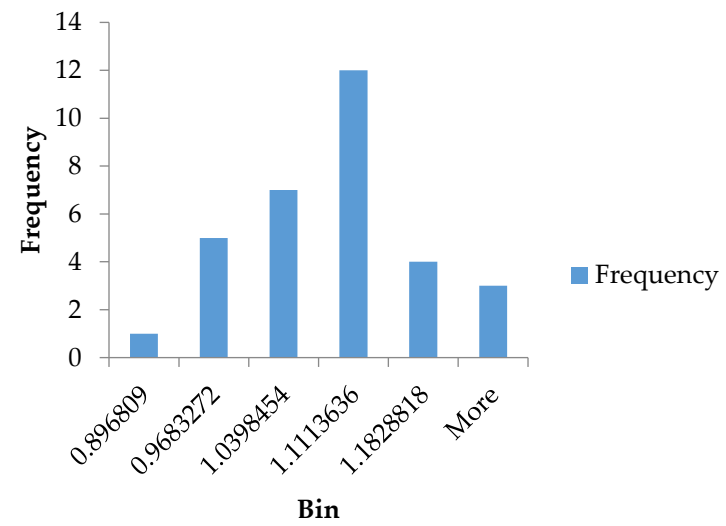

b

Figure S1. Histogram of vacuum residue fraction density (a), and that of vacuum residue density<sup>2</sup> (b)

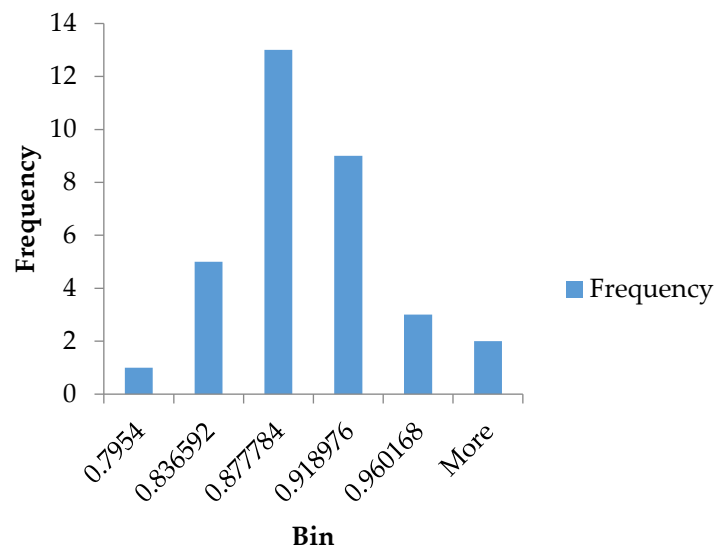

Figure S2. Histogram of crude oil density

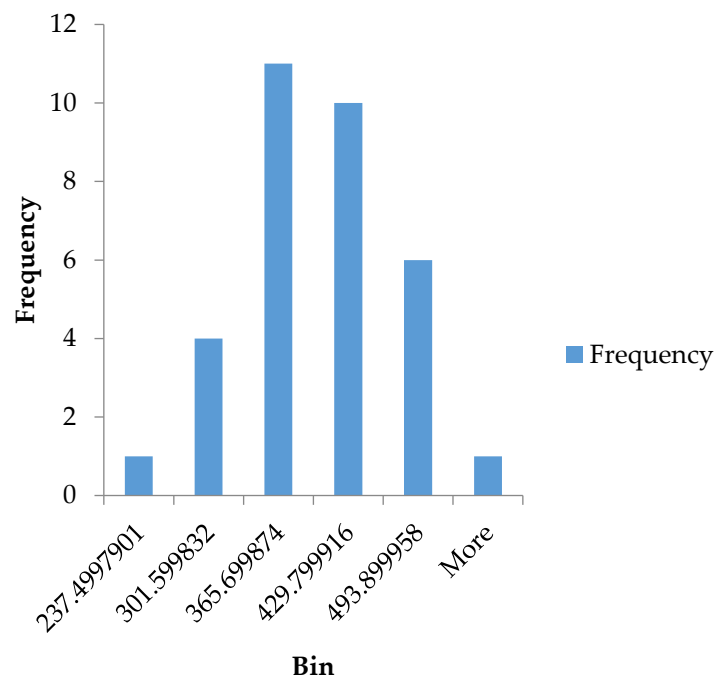

**a**

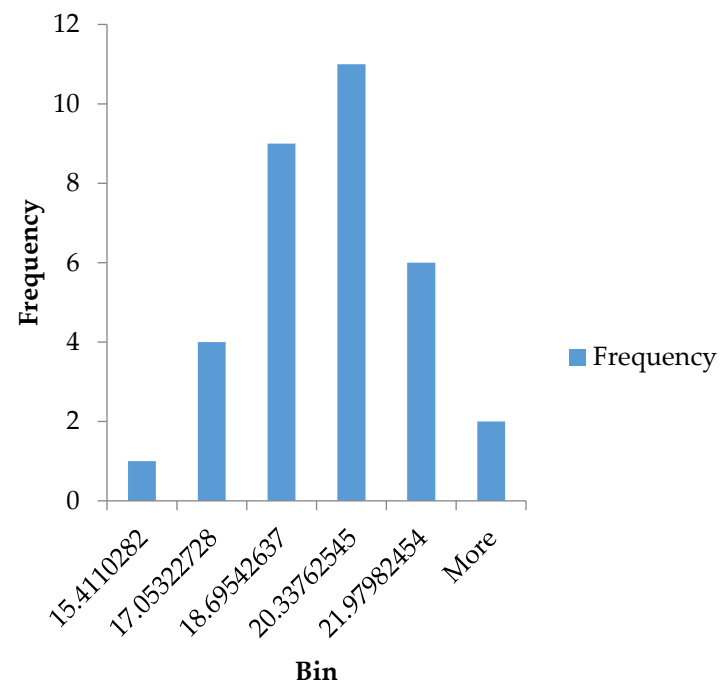

**b**

Figure S3. Histogram of crude oil T50% (a), and that of T50%<sup>2</sup> (b)



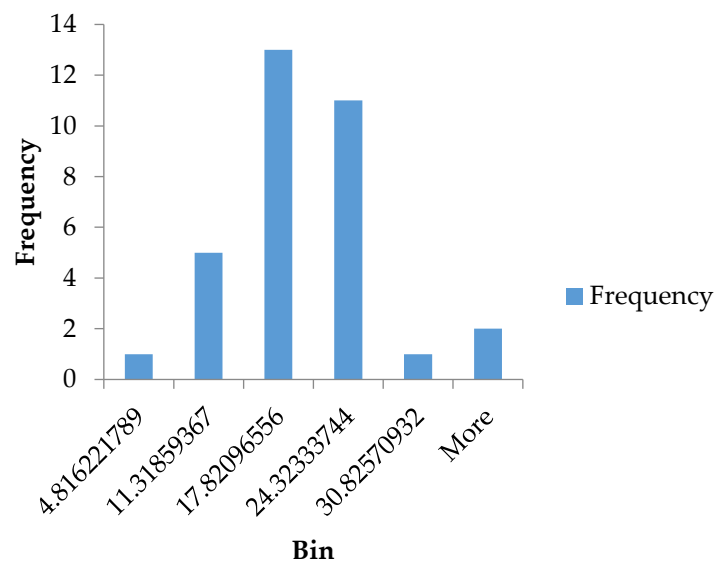

a

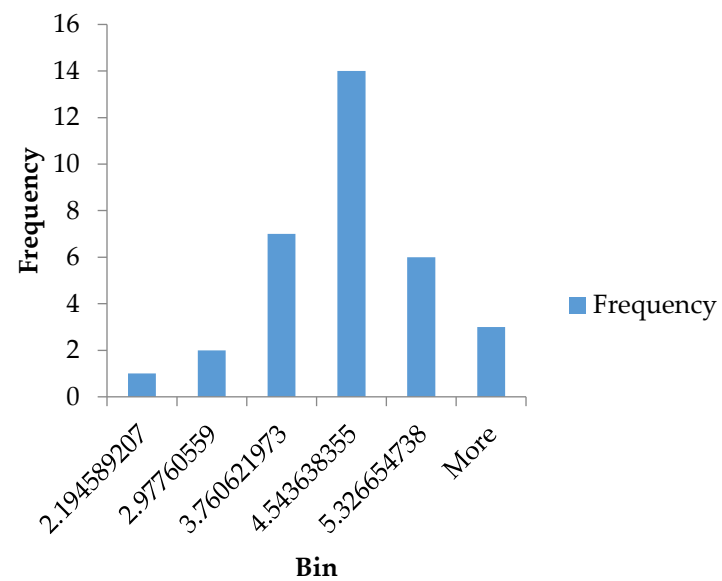

b

Figure S4 Histogram of crude oil  $S_{p \text{ critical}}$  (a), and that of  $S_{p \text{ critical}}^{0.5}$  (b)
